# Supplementary material for: TBX2-positive cells represent a multi-potent mesenchymal progenitor pool in the developing lung
Source: Respir Res. 2019 Dec 23;20:292. doi: 10.1186/s12931-019-1264-y (PMC6929292; doi:10.1186/s12931-019-1264-y)
Supplement: Supplementary file 3 — Additional file 3: Table S2. Statistical evaluation of contraction behavior of lung explant cultures. Raw measuring data, integral calculations and counted branching endpoints are depicted in “LOF data” and “GOF data” for controls and corresponding mutants. Statistical calculations are summarized in “LOF statistics” and “GOF statistics”. [file 12931_2019_1264_MOESM3_ESM.xls]

## Sheet: LOF data
Table S2: refers to Fig. 6B and 6C
Tbx2+/fl;R26mTmG/+ and Tbx2cre/fl;R26mTmG/+
Kymograph measurement																															Integral calculation
Culture 1					Culture 2					Culture 3						Culture 1				Culture 2					Culture 3							Culture 1					Culture 2					Culture 3						Culture 1
24hr																																24hr
Control 1	Control 2	Control 3	Control 4	Control 5	Control 6	Control 7	Control 8	Control 9	Control 10	Control 11	Control 12	Control 13	Control 14	Control 15		Mutant 1	Mutant 2	Mutant 3	Mutant 4	Mutant 5	Mutant 6	Mutant 7	Mutant 8	Mutant 9	Mutant 10	Mutant 11	Mutant 12	Mutant 13	Mutant 14			Control 1	Control 2	Control 3	Control 4	Control 5	Control 6	Control 7	Control 8	Control 9	Control 10	Control 11	Control 12	Control 13	Control 14	Control 15		Mutant 1	Mutant 2
0.00350749	0.00630656	0	0.00941111	0.00133819	0.00488857	0.0430253	0	0.00960691	0.00538475	0.00164654	0.00307758	0.00162094	0.00906096	0		0	0.00448647	0	0.0295823	0.00463958	0.00679685	0.00936658	0.00944153	0	0.00615905	0.0266969	0.00846337	0.00870918	0.00263491			0.0229908	0.0413971	0.0139676	0.0655262	0.0164095	0.054671	0.0466596	0.0433808	0.00974399	0.0094897	0.0216211	0.0115509	0.0258024	0.0212493	0.00527746		0.111962	0.0446139
0.0424741	0.0764877	0.0279352	0.121641	0.0314808	0.104454	0.050294	0.0867615	0.00988106	0.0135946	0.0415957	0.0200242	0.049984	0.0334377	0.0105549		0.223925	0.0847412	0.0517166	0.0515484	0.043282	0.0803215	0.0594764	0.0111646	0	0.0144634	0.0182246	0.0143714	0.0143226	0.0469186			0.111746	0.132224	0.0606205	0.157559	0.0751213	0.222668	0.142866	0.12745	0.0217201	0.0271936	0.104001	0.0652082	0.0798076	0.0525649	0.0242432		0.291798	0.133788
0.181017	0.18796	0.0933059	0.193476	0.118762	0.340883	0.235438	0.168139	0.0335592	0.0407926	0.166407	0.110392	0.109631	0.071692	0.0379315		0.359671	0.182834	0.0585112	0.0629939	0.0715029	0.0811582	0.127503	0.119359	0	0.0414104	0.0969292	0.0719553	0.0398478	0.22213			0.189985	0.248597	0.145513	0.225605	0.146407	0.36983	0.251108	0.195107	0.0718332	0.0525383	0.204629	0.120325	0.129914	0.10184	0.0547947		0.399384	0.235405
0.198952	0.309234	0.197721	0.257734	0.174051	0.398776	0.266777	0.222075	0.110107	0.064284	0.242851	0.130257	0.150196	0.131987	0.0716578		0.439097	0.287975	0.101517	0.0981101	0.086007	0.148086	0.142128	0.15949	0	0.0638021	0.165357	0.14552	0.0437586	0.219526			0.24908	0.301306	0.257416	0.338678	0.212393	0.413826	0.312039	0.268211	0.120876	0.0640085	0.244355	0.168948	0.19733	0.151074	0.0882437		0.427923	0.298426
0.299207	0.293378	0.317112	0.419622	0.250734	0.428876	0.3573	0.314347	0.131645	0.063733	0.245858	0.207639	0.244464	0.17016	0.10483		0.416748	0.308877	0.165287	0.119179	0.090475	0.249862	0.164655	0.13607	0	0.0608382	0.213766	0.203124	0.0789318	0.269926			0.330045	0.305895	0.323187	0.43781	0.265055	0.417943	0.374269	0.361169	0.140197	0.0756532	0.257547	0.22013	0.258489	0.186438	0.128522		0.430629	0.304321
0.360883	0.318411	0.329262	0.455997	0.279376	0.40701	0.391239	0.407991	0.148749	0.0875733	0.269236	0.232622	0.272513	0.202716	0.152215		0.44451	0.299765	0.16299	0.107296	0.104803	0.27604	0.159902	0.144901	0	0.0633386	0.244175	0.235641	0.0971565	0.356527			0.383571	0.319417	0.335065	0.452956	0.294538	0.390369	0.388466	0.4182	0.144746	0.096272	0.285533	0.230781	0.304699	0.205074	0.16103		0.457303	0.296156
0.406258	0.320422	0.340869	0.449914	0.309699	0.373729	0.385693	0.428409	0.140743	0.104971	0.301829	0.228941	0.336884	0.207431	0.169844		0.470097	0.292548	0.186354	0.124968	0.108675	0.274197	0.160788	0.198782	0	0.0572941	0.292186	0.267567	0.116226	0.417522			0.416068	0.333902	0.346314	0.451913	0.324417	0.349054	0.378892	0.428182	0.143019	0.114568	0.305346	0.234081	0.348226	0.211566	0.175519		0.475164	0.289634
0.425878	0.347382	0.351758	0.453911	0.339136	0.32438	0.372092	0.427955	0.145296	0.124165	0.308864	0.239221	0.359567	0.215701	0.181193		0.480232	0.286721	0.196789	0.137436	0.0836625	0.265805	0.168796	0.206821	0	0.0567965	0.304687	0.310351	0.135447	0.464895			0.423771	0.341002	0.354673	0.451699	0.340177	0.304912	0.36617	0.42501	0.147004	0.134497	0.303148	0.25677	0.378673	0.214073	0.174299		0.472762	0.289014
0.421664	0.334622	0.357588	0.449486	0.341217	0.285445	0.360248	0.422064	0.148712	0.144829	0.297432	0.274318	0.397779	0.212445	0.167406		0.465292	0.291306	0.186171	0.100938	0.0788842	0.25778	0.170971	0.206696	0	0.0492884	0.307486	0.313318	0.13544	0.475227			0.408542	0.334038	0.355289	0.45006	0.333187	0.280605	0.335779	0.41944	0.144149	0.141218	0.291717	0.281781	0.402242	0.215657	0.163204		0.455859	0.289884
0.39542	0.333454	0.35299	0.450633	0.325156	0.275765	0.311309	0.416816	0.139586	0.137607	0.286002	0.289243	0.406704	0.218869	0.159002		0.446427	0.288461	0.186544	0.100387	0.0687125	0.236124	0.169794	0.212966	0	0.077457	0.306341	0.307538	0.134957	0.481198			0.382995	0.337957	0.351384	0.447436	0.31952	0.258896	0.297893	0.409331	0.139446	0.138734	0.281904	0.283306	0.396042	0.211386	0.163809		0.432301	0.292972
0.37057	0.342459	0.349778	0.44424	0.313885	0.242027	0.284476	0.401845	0.139306	0.139861	0.277805	0.277369	0.38538	0.203903	0.168615		0.418175	0.297482	0.186906	0.118107	0.0581537	0.21646	0.171299	0.218716	0	0.0794927	0.295792	0.304135	0.133088	0.487063			0.336404	0.329222	0.348224	0.441432	0.305764	0.235199	0.27255	0.397085	0.146983	0.131882	0.271375	0.280896	0.383835	0.203308	0.163755		0.410405	0.30611
0.302239	0.315984	0.34667	0.438623	0.297644	0.228371	0.260625	0.392325	0.15466	0.123903	0.264945	0.284422	0.38229	0.202713	0.158894		0.402636	0.314739	0.195008	0.124509	0.0522885	0.188501	0.155912	0.21527	0	0.0924854	0.277439	0.299915	0.134908	0.504635			0.28906	0.286317	0.33618	0.432793	0.275788	0.207888	0.270076	0.378993	0.144712	0.126589	0.246629	0.287618	0.369009	0.198339	0.15834		0.399287	0.301524
0.275881	0.256651	0.32569	0.426962	0.253933	0.187404	0.279527	0.365662	0.134763	0.129274	0.228313	0.290813	0.355728	0.193965	0.157787		0.395937	0.288309	0.161461	0.10508	0.0181676	0.152534	0.12071	0.205943	0	0.0905959	0.260927	0.304593	0.138453	0.499074			0.237972	0.248286	0.324378	0.427158	0.244565	0.179583	0.268958	0.33467	0.132551	0.122766	0.216296	0.293994	0.352011	0.18961	0.147534		0.399839	0.27434
0.200062	0.239921	0.323066	0.427355	0.235196	0.171763	0.258388	0.303679	0.13034	0.116258	0.20428	0.297175	0.348295	0.185254	0.137281		0.403741	0.260371	0.150564	0.101537	0.0149496	0.111799	0.0941505	0.20634	0	0.0957601	0.23962	0.285426	0.130264	0.489144			0.162498	0.243065	0.320116	0.424251	0.230592	0.156089	0.250595	0.285571	0.122586	0.119606	0.20423	0.298582	0.34365	0.173813	0.12685		0.408473	0.253009
0.124933	0.246209	0.317166	0.421146	0.225988	0.140415	0.242803	0.267463	0.114833	0.122954	0.204181	0.299989	0.339004	0.162372	0.116419		0.413204	0.245648	0.136102	0.0917202	0.0218891	0.0722642	0.0680523	0.189807	0	0.0928589	0.229508	0.269902	0.131749	0.467314			0.112772	0.239287	0.314476	0.401598	0.215763	0.13025	0.234752	0.25261	0.103584	0.120877	0.208203	0.291175	0.313636	0.158733	0.108261		0.412497	0.237132
0.100611	0.232365	0.311786	0.38205	0.205538	0.120084	0.226702	0.237758	0.0923345	0.1188	0.212224	0.282361	0.288267	0.155093	0.100103		0.411791	0.228616	0.11646	0.0966437	0.036487	0.0636396	0.0640968	0.178844	0	0.0777187	0.193754	0.258471	0.130779	0.44848			0.0855186	0.221248	0.311911	0.351235	0.185088	0.111148	0.210792	0.221338	0.0962282	0.117455	0.214802	0.271767	0.276653	0.139268	0.0886102		0.408476	0.200308
0.0704268	0.210131	0.312037	0.320421	0.164638	0.102212	0.194882	0.204918	0.100122	0.11611	0.21738	0.261173	0.265039	0.123442	0.0771178		0.405161	0.172	0.111365	0.0933156	0.0346199	0.0683589	0.0498293	0.164788	0	0.0846502	0.180338	0.240557	0.124404	0.435543			0.0644338	0.19684	0.311181	0.293561	0.155105	0.0941598	0.181074	0.204766	0.0956771	0.106267	0.206178	0.259995	0.253328	0.106774	0.0626022		0.395971	0.156884
0.0584408	0.183549	0.310326	0.266702	0.145572	0.0861077	0.167265	0.204615	0.0912324	0.0964238	0.194976	0.258816	0.241617	0.0901063	0.0480866		0.38678	0.141767	0.0984496	0.0888111	0.0427773	0.0634489	0.027763	0.135481	0	0.0779311	0.173284	0.212931	0.11195	0.428291			0.0573049	0.177319	0.297352	0.263855	0.137919	0.0727372	0.152405	0.200073	0.0862224	0.0862133	0.179691	0.256744	0.246455	0.0815409	0.0438281		0.374755	0.129404
0.0561691	0.171089	0.284377	0.261008	0.130266	0.0593668	0.137545	0.195532	0.0812124	0.0760029	0.164405	0.254672	0.251293	0.0729755	0.0395697		0.362731	0.117042	0.0877623	0.0885973	0.0554372	0.051742	0.0287834	0.122457	0	0.0705338	0.159713	0.179507	0.099708	0.387903			0.0714056	0.165834	0.258067	0.252075	0.122402	0.0539944	0.129809	0.196028	0.0811733	0.0769726	0.168345	0.251656	0.234545	0.0598155	0.0347453		0.347872	0.0963734
0.0866422	0.160578	0.231757	0.243141	0.114538	0.048622	0.122073	0.196525	0.0811342	0.0779423	0.172285	0.24864	0.217796	0.0466555	0.029921		0.333014	0.0757048	0.0569288	0.0776408	0.0472035	0.0571998	0.0126826	0.115927	0	0.0678342	0.156709	0.167333	0.101488	0.360467			0.0790182	0.165196	0.215873	0.233958	0.117499	0.0410294	0.115779	0.191307	0.0805288	0.082625	0.162115	0.235713	0.208664	0.0394721	0.0410423		0.327142	0.0734997
0.0713942	0.169815	0.199989	0.224774	0.12046	0.0334367	0.109485	0.18609	0.0799234	0.0873077	0.151945	0.222785	0.199531	0.0322887	0.0521636		0.321271	0.0712945	0.0641726	0.0881453	0.049273	0.0511776	0	0.0999581	0	0.0665134	0.152784	0.141757	0.0958024	0.330047			0.074023	0.153606	0.193092	0.213389	0.121084	0.0325628	0.109375	0.183627	0.0718481	0.087411	0.141233	0.206409	0.195879	0.0306261	0.052117		0.314209	0.0695244
0.0766518	0.137398	0.186196	0.202004	0.121708	0.0316888	0.109265	0.181163	0.0637729	0.0875143	0.130521	0.190033	0.192226	0.0289635	0.0520703		0.307147	0.0677543	0.0666822	0.100712	0.0465747	0.0440222	0.00513393	0.091475	0	0.0729789	0.130106	0.125381	0.0860118	0.316388			0.0779894	0.116571	0.165966	0.17846	0.117138	0.0274555	0.100855	0.178365	0.0747996	0.0924523	0.112333	0.178162	0.195197	0.0276519	0.0515332		0.303307	0.057235
0.0793269	0.0957447	0.145736	0.154915	0.112567	0.0232222	0.0924446	0.175566	0.0858263	0.0973903	0.0941459	0.166292	0.198168	0.0263403	0.050996		0.299467	0.0467158	0.0484274	0.104223	0.0567533	0.0307992	0.015895	0.0889041	0	0.064845	0.104549	0.0885375	0.0787927	0.28132			0.078868	0.0913967	0.139447	0.158388	0.111387	0.0253206	0.0803991	0.174482	0.0836948	0.0954779	0.0803951	0.151519	0.192841	0.0249216	0.0483537		0.29034	0.0417197
0.0784092	0.0870486	0.133159	0.161861	0.110207	0.0274189	0.0683536	0.173397	0.0815633	0.0935656	0.0666443	0.136746	0.187514	0.0235029	0.0457113		0.281212	0.0367236	0.0189405	0.108206	0.0595461	0.028351	0.0294415	0.101928	0	0.0590696	0.0763184	0.0820218	0.0705651	0.260596			0.0836189	0.0709308	0.128577	0.156508	0.110135	0.0294617	0.0665243	0.161557	0.0812732	0.0922589	0.0711831	0.118292	0.174944	0.0216581	0.0444294		0.258236	0.0311576
0.0888285	0.054813	0.123995	0.151155	0.110062	0.0315044	0.0646951	0.149717	0.0809831	0.0909521	0.0757219	0.0998381	0.162374	0.0198134	0.0431475		0.23526	0.0255916	0.0227741	0.13298	0.024073	0.0126526	0.0515383	0.104141	0	0.0384072	0.0629482	0.0667048	0.0679488	0.265189			0.08338	0.0601106	0.121057	0.155723	0.108637	0.0303653	0.0596547	0.147743	0.0714514	0.0878561	0.070853	0.100996	0.1543	0.0264763	0.0384446		0.225791	0.0235341
0.0779314	0.0654083	0.11812	0.160291	0.107212	0.0292263	0.0546143	0.145769	0.0619196	0.0847601	0.0659842	0.102154	0.146225	0.0331391	0.0337417		0.216321	0.0214766	0.0159795	0.117131	0.026323	0.0136452	0.0468363	0.0958776	0	0.0430279	0.0508362	0.0514328	0.0678693	0.261361			0.0389657	0.0327041	0.0590598	0.0801454	0.0536058	0.0146131	0.0273072	0.0728843	0.0309598	0.04238	0.0329921	0.0510772	0.0731127	0.0165696	0.0168709		0.108161	0.0107383
																															Integral sum	4.85202	5.49367	6.38839	7.94377	4.9397	4.50463	5.42505	6.67658	2.58701	2.44326	4.88665	5.40748	6.48928	3.0695	2.36626		9.33985	4.73671
36hr																																36hr
Control 1	Control 2	Control 3	Control 4	Control 5	Control 6	Control 7	Control 8	Control 9	Control 10	Control 11	Control 12	Control 13	Control 14	Control 15		Mutant 1	Mutant 2	Mutant 3	Mutant 4	Mutant 5	Mutant 6	Mutant 7	Mutant 8	Mutant 9	Mutant 10	Mutant 11	Mutant 12	Mutant 13	Mutant 14			Control 1	Control 2	Control 3	Control 4	Control 5	Control 6	Control 7	Control 8	Control 9	Control 10	Control 11	Control 12	Control 13	Control 14	Control 15		Mutant 1	Mutant 2
0.00100418	0.00298211	0.00949187	0	0	0	0.00127812	0.0140812	0.0134298	0.0110131	0.000709915	0	0	0	0.00640631		0.000171159	0	0	0.00360482	0.00220877	0.00659038	0.00210363	0.00804568	0.00509939	0.00147141	0.0184242	0.0198474	0	0.00079216			0.0170225	0.0655415	0.0065039	0.0571175	0.00496189	0.00172622	0.0057577	0.0204383	0.0287114	0.0307213	0.0081481	0.0126186	0.0159445	0.0123996	0.0189187		0.00145548	0.0103499
0.0330409	0.128101	0.00351593	0.114235	0.00992377	0.00345243	0.0102373	0.0267955	0.043993	0.0504296	0.0155863	0.0252372	0.0318889	0.0247992	0.0314311		0.00273981	0.0206998	0.0988373	0.0183187	0.0155544	0.11613	0.0209647	0.0232408	0.0287557	0.0150918	0.0401918	0.0142631	0.0891466	0.0219811			0.138778	0.201416	0.0206042	0.160984	0.0398375	0.0835091	0.102891	0.0792609	0.0851254	0.0832793	0.0293713	0.0631565	0.0568504	0.0358864	0.0413155		0.13432	0.0700427
0.244515	0.27473	0.0376926	0.207733	0.0697513	0.163566	0.195544	0.131726	0.126258	0.116129	0.0431563	0.101076	0.0818119	0.0469736	0.0511999		0.2659	0.119386	0.285367	0.0966041	0.0603512	0.263745	0.0808053	0.138457	0.153913	0.171674	0.128964	0.0345535	0.151841	0.0924998			0.30652	0.36791	0.0608236	0.242061	0.128343	0.203005	0.24382	0.242331	0.131885	0.133089	0.0519026	0.139399	0.124822	0.0505143	0.0746585		0.352933	0.206165
0.368524	0.46109	0.0839546	0.276389	0.186936	0.242445	0.292096	0.352935	0.137513	0.150048	0.0606489	0.177723	0.167833	0.054055	0.0981172		0.439966	0.292944	0.443878	0.196099	0.172319	0.311268	0.191868	0.214926	0.197061	0.308372	0.105518	0.128227	0.256065	0.142909			0.424721	0.52539	0.144794	0.344371	0.28653	0.29476	0.337406	0.423216	0.158875	0.177834	0.0804606	0.201971	0.181651	0.0636539	0.116853		0.55811	0.394457
0.480918	0.589691	0.205634	0.412352	0.386124	0.347075	0.382717	0.493497	0.180237	0.20562	0.100272	0.22622	0.195469	0.0732529	0.135589		0.676254	0.49597	0.552564	0.340343	0.300619	0.350518	0.302479	0.318112	0.416175	0.387597	0.139023	0.18503	0.272983	0.25972			0.533539	0.592257	0.225483	0.438853	0.391666	0.35772	0.402538	0.5107	0.177062	0.207902	0.148442	0.251341	0.209813	0.0801938	0.153427		0.691416	0.526464
0.586161	0.594824	0.245332	0.465355	0.397208	0.368366	0.422359	0.527903	0.173887	0.210184	0.196611	0.276463	0.224157	0.0871348	0.171264		0.706578	0.556958	0.610167	0.371437	0.384054	0.360671	0.374628	0.447683	0.483717	0.397418	0.182566	0.20857	0.276109	0.389817			0.625647	0.613899	0.282383	0.457001	0.444663	0.362085	0.430147	0.520064	0.17679	0.226036	0.225549	0.284132	0.245032	0.084893	0.181931		0.710842	0.587934
0.665133	0.632975	0.319434	0.448648	0.492117	0.355804	0.437936	0.512225	0.179693	0.241887	0.254488	0.2918	0.265906	0.0826512	0.192599		0.715106	0.618911	0.653953	0.394867	0.499408	0.33044	0.379003	0.509514	0.477542	0.389087	0.180898	0.238068	0.331799	0.412165			0.667969	0.627154	0.326104	0.448167	0.497877	0.332227	0.416974	0.512315	0.189285	0.239155	0.263527	0.288261	0.278447	0.0822774	0.216151		0.701609	0.612092
0.670806	0.621334	0.332774	0.447685	0.503637	0.30865	0.396013	0.512404	0.198876	0.236423	0.272567	0.284721	0.290988	0.0819035	0.239703		0.688113	0.605272	0.672096	0.43293	0.517759	0.308097	0.376744	0.514256	0.480472	0.393732	0.197647	0.29955	0.376277	0.403007			0.669704	0.611208	0.336388	0.445858	0.503411	0.255104	0.372222	0.504692	0.195921	0.228185	0.268857	0.274142	0.297354	0.085639	0.257781		0.683904	0.598429
0.668602	0.601082	0.340003	0.44403	0.503184	0.201558	0.348432	0.496979	0.192965	0.219948	0.265147	0.263563	0.303719	0.0893745	0.275859		0.679696	0.591585	0.68082	0.457154	0.540745	0.288553	0.373298	0.503355	0.479851	0.382209	0.189275	0.345653	0.418314	0.407397			0.652334	0.578865	0.332369	0.443679	0.498807	0.189197	0.314478	0.487296	0.177429	0.211872	0.267819	0.248162	0.304358	0.0845402	0.281936		0.682619	0.589719
0.636065	0.556648	0.324735	0.443329	0.494431	0.176836	0.280524	0.477614	0.161893	0.203796	0.270492	0.232761	0.304998	0.079706	0.288012		0.685543	0.587854	0.683458	0.463891	0.545695	0.283518	0.312881	0.477085	0.475125	0.361884	0.179226	0.361991	0.443013	0.413067			0.617639	0.531869	0.310391	0.44641	0.485831	0.165492	0.258902	0.432935	0.14431	0.181872	0.258725	0.221281	0.301764	0.0769615	0.286915		0.688691	0.588907
0.599212	0.50709	0.296046	0.44949	0.477232	0.154147	0.237281	0.388257	0.126727	0.159948	0.246958	0.209801	0.298531	0.0742171	0.285818		0.691839	0.589959	0.682618	0.455139	0.524553	0.247068	0.224372	0.404674	0.453823	0.356896	0.190945	0.347652	0.444482	0.408614			0.559351	0.48585	0.277752	0.44877	0.464217	0.148889	0.224331	0.360561	0.114237	0.158132	0.232943	0.19663	0.299135	0.0756918	0.28574		0.697267	0.589094
0.51949	0.46461	0.259457	0.44805	0.451201	0.14363	0.211381	0.332865	0.101747	0.156317	0.218929	0.18346	0.299738	0.0771664	0.285662		0.702695	0.588228	0.675054	0.43724	0.504046	0.192329	0.172625	0.337977	0.445156	0.311371	0.174203	0.336084	0.432984	0.407239			0.450918	0.451361	0.235888	0.431418	0.398116	0.129539	0.179156	0.293029	0.101295	0.142265	0.207168	0.172488	0.294422	0.0766234	0.276092		0.70734	0.57191
0.382346	0.438112	0.212319	0.414786	0.345032	0.115447	0.146931	0.253192	0.100844	0.128213	0.195407	0.161517	0.289107	0.0760803	0.266522		0.711986	0.555591	0.657904	0.381878	0.421388	0.173861	0.130895	0.290485	0.419027	0.264778	0.172524	0.32687	0.42822	0.406093			0.368835	0.421067	0.200264	0.395955	0.321046	0.118855	0.145244	0.224147	0.0934849	0.116079	0.185537	0.153657	0.292384	0.0720473	0.257358		0.711616	0.543683
0.355324	0.404022	0.188208	0.377123	0.297059	0.122264	0.143557	0.195102	0.0861263	0.103944	0.175668	0.145798	0.29566	0.0680143	0.248194		0.711247	0.531775	0.647022	0.341609	0.330708	0.153818	0.0729552	0.226338	0.35451	0.262974	0.172523	0.308224	0.413809	0.384525			0.334897	0.352808	0.168408	0.33894	0.292534	0.116765	0.121439	0.184362	0.0858663	0.0919202	0.152119	0.13893	0.28758	0.0677854	0.23219		0.66735	0.502027
0.31447	0.301594	0.148607	0.300757	0.288008	0.111266	0.0993219	0.173622	0.0856064	0.0798966	0.128571	0.132062	0.279499	0.0675566	0.216185		0.623454	0.47228	0.595648	0.272606	0.178704	0.12238	0.0522253	0.178583	0.283619	0.256235	0.144053	0.300592	0.386386	0.365069			0.306826	0.299921	0.136928	0.28094	0.278566	0.107834	0.100478	0.179187	0.0830284	0.0766695	0.113932	0.119957	0.280519	0.0677244	0.189913		0.625224	0.451453
0.299182	0.298249	0.125249	0.261123	0.269125	0.104401	0.101634	0.184751	0.0804504	0.0734423	0.0992931	0.107852	0.281539	0.0678923	0.16364		0.626995	0.430627	0.569541	0.249317	0.137294	0.118046	0.100646	0.181021	0.270066	0.213446	0.135676	0.28395	0.362792	0.334333			0.29318	0.281497	0.101506	0.244293	0.238859	0.102959	0.0946058	0.18773	0.0712995	0.065476	0.0968885	0.10315	0.268725	0.0595376	0.144031		0.607341	0.370288
0.287177	0.264745	0.0777629	0.227464	0.208593	0.101517	0.0875776	0.190708	0.0621486	0.0575097	0.0944838	0.0984486	0.255911	0.051183	0.124421		0.587686	0.309949	0.519648	0.275557	0.063406	0.107444	0.118522	0.161852	0.25176	0.142544	0.120605	0.258435	0.325661	0.328804			0.289314	0.262692	0.0748186	0.222671	0.19713	0.100429	0.0834644	0.184411	0.0637495	0.0579413	0.0822699	0.0941363	0.241713	0.0475515	0.115073		0.566047	0.287062
0.291452	0.260639	0.0718743	0.217878	0.185668	0.0993416	0.0793512	0.178114	0.0653504	0.0583728	0.070056	0.0898239	0.227516	0.0439201	0.105726		0.544407	0.264174	0.496512	0.262229	0.0461737	0.0929463	0.126587	0.141215	0.226444	0.100027	0.127304	0.228561	0.303599	0.325204			0.29675	0.241539	0.0625141	0.201089	0.169146	0.0919743	0.0705081	0.174357	0.0643955	0.0617997	0.0645488	0.0856783	0.226366	0.0424009	0.0972563		0.487506	0.230379
0.302049	0.22244	0.0531539	0.1843	0.152625	0.0846069	0.0616649	0.170601	0.0634407	0.0652266	0.0590416	0.0815326	0.225217	0.0408818	0.0887871		0.430605	0.196584	0.448646	0.222722	0.0247124	0.0703194	0.127571	0.1104	0.200529	0.0814264	0.0988311	0.201943	0.287291	0.341294			0.292915	0.213451	0.05078	0.183761	0.146577	0.0794698	0.0492531	0.164763	0.0535638	0.0576072	0.0562972	0.0848457	0.208778	0.0337331	0.0722581		0.415565	0.183612
0.283781	0.204462	0.0484061	0.183221	0.140529	0.0743326	0.0368413	0.158925	0.0436869	0.0499879	0.0535527	0.0881587	0.19234	0.0265844	0.0557291		0.400525	0.170641	0.425562	0.207378	0.0170437	0.0669741	0.110649	0.078498	0.175513	0.0770686	0.0971544	0.175435	0.262833	0.343634			0.284131	0.204252	0.051658	0.181717	0.132587	0.0712604	0.0331368	0.153786	0.0470077	0.0529592	0.0460245	0.0864926	0.186914	0.0306197	0.0570121		0.378288	0.157617
0.284481	0.204042	0.05491	0.180213	0.124644	0.0681883	0.0294322	0.148647	0.0503286	0.0559306	0.0384963	0.0848265	0.181488	0.0346551	0.0582951		0.356051	0.144593	0.406399	0.199945	0.0199603	0.0372342	0.0871789	0.0833619	0.161601	0.0778581	0.0921325	0.152614	0.235941	0.325602			0.280515	0.200728	0.0562171	0.172591	0.120538	0.0605037	0.0328925	0.140679	0.047181	0.0587023	0.0324822	0.0839388	0.175641	0.0329929	0.0453081		0.346178	0.130904
0.276549	0.197414	0.0575241	0.164969	0.116433	0.052819	0.0363528	0.13271	0.0440334	0.061474	0.026468	0.0830512	0.169794	0.0313307	0.032321		0.336305	0.117216	0.382907	0.193635	0.0179531	0.0273843	0.0849248	0.0724713	0.129942	0.0927773	0.103855	0.132846	0.209828	0.293702			0.265164	0.190073	0.0563429	0.148212	0.110298	0.053893	0.0345647	0.120864	0.0426972	0.0604663	0.0151825	0.0804416	0.166364	0.0349602	0.0272325		0.315752	0.0992198
0.253779	0.182731	0.0551618	0.131454	0.104164	0.054967	0.0327765	0.109018	0.041361	0.0594587	0.00389709	0.0778321	0.162935	0.0385896	0.022144		0.295199	0.0812238	0.362223	0.180953	0.0109612	0.0274595	0.0701044	0.0630101	0.116276	0.0980973	0.0871039	0.0975581	0.199231	0.250254			0.24618	0.190027	0.0566538	0.1289	0.103746	0.057009	0.0345716	0.102465	0.0310267	0.0595019	0.00643996	0.0876994	0.153574	0.0353738	0.0167274		0.287478	0.0727797
0.238581	0.197322	0.0581459	0.126347	0.103329	0.0590509	0.0363666	0.0959129	0.0206925	0.0595452	0.00898283	0.0975668	0.144213	0.032158	0.0113109		0.279757	0.0643356	0.358414	0.162229	0.0122426	0.0153463	0.0679775	0.0798293	0.119599	0.0970462	0.0904474	0.0784745	0.179579	0.211496			0.23038	0.193395	0.0555118	0.108897	0.09234	0.0498644	0.0334163	0.0911872	0.0188539	0.0637579	0.0107054	0.0958607	0.135563	0.0352376	0.0127305		0.27156	0.0519081
0.222178	0.189469	0.0528777	0.0914473	0.081351	0.0406779	0.0304661	0.0864614	0.0170154	0.0679707	0.012428	0.0941546	0.126914	0.0383173	0.01415		0.263362	0.0394807	0.360532	0.138979	0.0248855	0.0138538	0.054983	0.0569373	0.110736	0.08871	0.0887757	0.077569	0.170523	0.17761			0.111089	0.0947344	0.0264389	0.0457237	0.0406755	0.0203389	0.015233	0.0432307	0.00850768	0.0339853	0.00621398	0.0470773	0.0634569	0.0191586	0.007075		0.131681	0.0197403
																															Integral sum	9.26432	8.79891	3.65752	7.01838	6.3883	3.55441	4.13743	6.33801	2.39159	2.87721	2.91155	3.61545	5.29717	1.3884	3.46588		12.4221	8.44624
Branching endpoints
	12 hr			18 hr			24 hr			36 hr
	Control	Mutant		Control	Mutant		Control	Mutant		Control	Mutant
1	8	9		8	9		9	9		10	10
2	8	8		8	8		8	8		9	9
3	9	7		9	7		9	10		10	12
4	8	7		8	8		8	8		9	10
5	9	9		9	9		9	9		10	11
6	9	9		10	10		10	9		10	10
7	9	9		9	9		9	10		11	11
8	9	8		10	8		10	8		12	10
9	9	9		9	9		10	9		11	11
10	9	9		10	9		10	9		11	11
11	9	9		10	10		11	10		12	12
12	9	9		9	9		10	10		12	11
13	9	9		9	9		9	9		10	10
14	8			8			9			10
15	8			9			9			9
[truncated: 12 more columns]

## Sheet: LOF statistics
Table S2: refers to Fig. 6B and 6C
Tbx2+/fl;R26mTmG/+ and Tbx2cre/fl;R26mTmG/+
Kymograph measurement											Integral calculation
24hr	Control			Mutant							24hr
	average	sd		average	sd		t-test						Integral			Integral		t-test
	0.00659166	0.0106367		0.00835548	0.00906185		0.63582	n.s				Control 1	4.85202		Mutant 1	9.33985		0.18883	n.s
	0.04804	0.0345521		0.051034	0.0563874		0.863349	n.s				Control 2	5.49367		Mutant 2	4.73671
	0.139292	0.0838673		0.1097	0.0924557		0.374093	n.s				Control 3	6.38839		Mutant 3	2.83386
	0.195111	0.091348		0.150027	0.11032		0.239786	n.s				Control 4	7.94377		Mutant 4	2.55501
	0.256594	0.10776		0.176981	0.110274		0.0596759	n.s				Control 5	4.9397		Mutant 5	1.38284
	0.28772	0.10836		0.192646	0.122603		0.0352872	*				Control 6	4.50463		Mutant 6	3.09937
	0.300376	0.107083		0.211943	0.132573		0.0576804	n.s				Control 7	5.42505		Mutant 7	2.27082
	0.307767	0.103731		0.221317	0.141551		0.0701993	n.s				Control 8	6.67658		Mutant 8	3.73683
	0.307684	0.101298		0.217057	0.144267		0.0593045	n.s				Control 9	2.58701		Mutant 9	0
	0.299904	0.100349		0.215493	0.140359		0.071929	n.s				Control 10	2.44326		Mutant 10	1.66247
	0.289435	0.0959229		0.213205	0.137149		0.0924543	n.s				Control 11	4.88665		Mutant 11	4.70713
	0.276954	0.0920602		0.211303	0.137804		0.140546	n.s				Control 12	5.40748		Mutant 12	4.95222
	0.25749	0.0877953		0.195842	0.140859		0.165569	n.s				Control 13	6.48928		Mutant 13	2.50422
	0.238554	0.0885586		0.184548	0.14017		0.222177	n.s				Control 14	3.0695		Mutant 14	9.178
	0.223058	0.0940995		0.173573	0.13936		0.269337	n.s				Control 15	2.36626
	0.204405	0.0885333		0.164699	0.134474		0.35279	n.s
	0.18267	0.0830457		0.154638	0.129588		0.490818	n.s			average		4.89822			3.78281
	0.162922	0.0829222		0.142119	0.126155		0.601598	n.s			sd		1.67682			2.69592
	0.149032	0.0846025		0.129423	0.114694		0.602837	n.s
	0.13855	0.0764644		0.116438	0.108339		0.528484	n.s
	0.129426	0.068525		0.109443	0.10134		0.536581	n.s
	0.119412	0.0611158		0.104312	0.0957399		0.614256	n.s
	0.106579	0.0526609		0.0935163	0.0891351		0.631932	n.s
	0.0983401	0.0511172		0.0866371	0.0841011		0.651722	n.s
	0.08984	0.0438403		0.0793007	0.0809725		0.66339	n.s
36hr	Control			Mutant							36hr
	average	sd		average	sd		t-test						Integral			Integral		t-test
1	0.00402644	0.0053447		0.00488278	0.00655672		0.702008	n.s				Control 1	9.26432		Mutant 1	12.4221		0.0460056	*
2	0.0530923	0.049109		0.0375654	0.0359441		0.957967	n.s				Control 2	8.79891		Mutant 2	8.44624
3	0.148797	0.0857299		0.146004	0.0778474		0.493356	n.s				Control 3	3.65752		Mutant 3	12.2698
4	0.239527	0.122765		0.242959	0.105811		0.409735	n.s				Control 4	7.01838		Mutant 4	6.75486
5	0.331213	0.151158		0.356956	0.142912		0.273878	n.s				Control 5	6.3883		Mutant 5	5.37164
6	0.371171	0.153406		0.410741	0.144942		0.169548	n.s				Control 6	3.55441		Mutant 6	4.0827
7	0.393838	0.156058		0.437912	0.152901		0.195201	n.s				Control 7	4.13743		Mutant 7	4.01594
8	0.394492	0.151433		0.447568	0.142132		0.135561	n.s				Control 8	6.33801		Mutant 8	5.6173
9	0.385587	0.15407		0.452708	0.140393		0.0748063	n.s				Control 9	2.39159		Mutant 9	6.91376
10	0.369343	0.157165		0.448159	0.145817		0.0451332	*				Control 10	2.87721		Mutant 10	5.32906
11	0.343826	0.159026		0.430188	0.155521		0.032553	*				Control 11	2.91155		Mutant 11	3.24866
12	0.31722	0.159096		0.408374	0.170681		0.0314093	*				Control 12	3.61545		Mutant 12	5.13264
13	0.283988	0.155823		0.381536	0.174575		0.0129272	*				Control 13	5.29717		Mutant 13	7.25871
14	0.256483	0.152196		0.35086	0.181623		0.0195615	*				Control 14	1.3884		Mutant 14	7.44643
15	0.220736	0.137343		0.302274	0.17164		0.0247762	*				Control 15	3.46588
16	0.205402	0.132457		0.286696	0.164312		0.0213643	*
17	0.181878	0.123483		0.255134	0.154699		0.0242843	*			average		4.7403			6.73641
18	0.167632	0.117396		0.23467	0.14803		0.0341024	*			sd		2.34682			2.78668
19	0.147303	0.10537		0.203063	0.132462		0.0594889	n.s
20	0.133953	0.102507		0.186351	0.128537		0.0602886	n.s
21	0.125579	0.0959197		0.170034	0.120904		0.100791	n.s
22	0.11539	0.0898156		0.156839	0.11243		0.111843	n.s
23	0.103402	0.0827511		0.138547	0.104249		0.138058	n.s
24	0.0978468	0.0793246		0.129769	0.0991654		0.174003	n.s
25	0.0783797	0.0738657		0.119067	0.0974559		0.18151	n.s
Branching endpoints
	Control			Mutant
	average	sd		average	sd		ttest
12hr	8.66667	0.48795		8.53846	0.77625		0.600077	n.s
18hr	9	0.755929		8.76923	0.83205		0.448843	n.s
24hr	9.33333	0.816497		9.07692	0.759555		0.399953	n.s
36hr	10.4	1.0556		10.6154	0.869718		0.564626	n.s

## Sheet: GOF data
Table S2: refers to Fig. 6B and 6C
Tbx2+/+;HprtTBX2/+ and Tbx2cre/+;HprtTBX2/y
Kymograph measurement																							Integral calculation
Culture 1		Culture 2						Culture 3								Culture 1	Culture2		Culture 3					Culture 1		Culture 2						Culture 3								Culture 1	Culture2		Culture 3
24hr																								24hr
Control 1	Control 2	Control 3	Control 4	Control 5	Control 6	Control 7	Control 8	Control 9	Control 10	Control 11	Control 12	Control 13	Control 14	Control 15		Mutant 1	Mutant 2	Mutant 3	Mutant 4	Mutant 5	Mutant 6			Control 1	Control 2	Control 3	Control 4	Control 5	Control 6	Control 7	Control 8	Control 9	Control 10	Control 11	Control 12	Control 13	Control 14	Control 15		Mutant 1	Mutant 2	Mutant 3	Mutant 4	Mutant 5	Mutant 6
0.0183794	0.335083	0.014668	0.0294266	0.0165908	0.0123014	0.0186419	0.00366268	0.01026	0.0107926	0	0	0.00536886	0	0.00804971		0.000445216	0.0108627	0.0028567	0	0	0.00155199			0.0184207	0.33692	0.0271706	0.0263453	0.0226385	0.0181406	0.0287935	0.00735655	0.0609197	0.0199522	0	0	0.00623347	0.0104973	0.00890775		0.00423013	0.0327475	0.00777576	0	0	0.00387371
0.0184619	0.338757	0.0396731	0.023264	0.0286861	0.0239798	0.0389451	0.0110504	0.111579	0.0291117	0	0	0.00709808	0.0209946	0.00976579		0.00801504	0.0546324	0.0126948	0	0	0.00619543			0.0417108	0.366157	0.121876	0.1056	0.0449139	0.0710127	0.0594222	0.0164032	0.210899	0.0671441	0	0	0.021597	0.0572865	0.037725		0.0298646	0.0850392	0.0188731	0	0	0.0186805
0.0649597	0.393557	0.20408	0.187936	0.0611418	0.118046	0.0798994	0.0217559	0.310218	0.105177	0	0	0.036096	0.0935783	0.0656843		0.0517141	0.115446	0.0250514	0	0	0.0311655			0.0769231	0.431765	0.234554	0.312975	0.0893733	0.151737	0.0959846	0.0560816	0.344678	0.114511	0	0	0.0530751	0.117375	0.0945723		0.0688727	0.117209	0.0433791	0	0	0.0410963
0.0888865	0.469974	0.265028	0.438013	0.117605	0.185428	0.11207	0.0904073	0.379138	0.123845	0	0	0.0700542	0.141172	0.12346		0.0860312	0.118972	0.0617068	0	0	0.0510271			0.105182	0.482561	0.283344	0.465264	0.138992	0.223856	0.152077	0.119602	0.400073	0.13396	0	0	0.104228	0.163921	0.144233		0.111594	0.139283	0.0961145	0	0	0.0579415
0.121478	0.495147	0.301659	0.492514	0.16038	0.262284	0.192084	0.148796	0.421008	0.144075	0	0	0.138401	0.18667	0.165006		0.137157	0.159594	0.130522	0	0	0.0648559			0.124822	0.503418	0.305079	0.497203	0.157677	0.290752	0.237939	0.161168	0.427913	0.153417	0	0	0.159159	0.206258	0.179154		0.141413	0.153761	0.146061	0	0	0.0683624
0.128165	0.511688	0.308498	0.501891	0.154975	0.319221	0.283795	0.173539	0.434818	0.162759	0	0	0.179917	0.225846	0.193301		0.14567	0.147929	0.161599	0	0	0.071869			0.130715	0.514491	0.313395	0.506895	0.15894	0.335832	0.28904	0.182572	0.436399	0.154699	0	0	0.207365	0.233758	0.195216		0.162101	0.153659	0.180339	0	0	0.0687115
0.133266	0.517295	0.318292	0.511899	0.162905	0.352443	0.294285	0.191606	0.43798	0.146639	0	0	0.234812	0.24167	0.197131		0.178533	0.159389	0.199079	0	0	0.0655541			0.137401	0.516666	0.310364	0.506749	0.15832	0.360034	0.295231	0.184536	0.430362	0.139659	0	0	0.258228	0.2623	0.20264		0.177737	0.149783	0.199981	0	0	0.0811081
0.141536	0.516038	0.302436	0.501598	0.153734	0.367625	0.296178	0.177466	0.422743	0.13268	0	0	0.281644	0.282929	0.208149		0.176941	0.140176	0.200883	0	0	0.0966621			0.14426	0.513069	0.300385	0.507465	0.151694	0.377252	0.300862	0.166968	0.412557	0.126504	0	0	0.296824	0.289851	0.204922		0.179858	0.135328	0.200163	0	0	0.096491
0.146983	0.5101	0.298333	0.513331	0.149654	0.38688	0.305547	0.15647	0.40237	0.120327	0	0	0.312004	0.296773	0.201695		0.182775	0.13048	0.199443	0	0	0.0963199			0.141778	0.509656	0.291642	0.507255	0.146468	0.383635	0.296462	0.147943	0.394819	0.126345	0	0	0.319376	0.298209	0.198416		0.18418	0.125177	0.18195	0	0	0.0952746
0.136574	0.509212	0.284951	0.50118	0.143282	0.380389	0.287377	0.139416	0.387267	0.132362	0	0	0.326749	0.299645	0.195138		0.185585	0.119874	0.164457	0	0	0.0942293			0.123169	0.497114	0.269398	0.49774	0.133551	0.37941	0.282568	0.120405	0.380185	0.132841	0	0	0.331858	0.299373	0.191394		0.177997	0.117902	0.161576	0	0	0.0889749
0.109764	0.485015	0.253845	0.4943	0.123821	0.37843	0.277759	0.101395	0.373102	0.133321	0	0	0.336967	0.2991	0.18765		0.17041	0.115931	0.158695	0	0	0.0837204			0.106099	0.478815	0.230091	0.487544	0.117654	0.373566	0.261237	0.102822	0.363165	0.129661	0	0	0.346408	0.297452	0.179395		0.161186	0.0990501	0.148788	0	0	0.0820644
0.102434	0.472614	0.206337	0.480788	0.111487	0.368701	0.244716	0.104249	0.353229	0.126001	0	0	0.35585	0.295804	0.17114		0.151962	0.0821695	0.13888	0	0	0.0804083			0.0989129	0.464177	0.192453	0.481437	0.103547	0.351773	0.220051	0.092093	0.339284	0.114687	0	0	0.361799	0.289996	0.171911		0.140275	0.0781439	0.132562	0	0	0.0756686
0.0953915	0.455739	0.178568	0.482086	0.0956063	0.334845	0.195385	0.0799367	0.325339	0.103373	0	0	0.367748	0.284188	0.172682		0.128587	0.0741183	0.126244	0	0	0.0709289			0.0985714	0.459903	0.180386	0.464473	0.0922641	0.31929	0.184192	0.0817183	0.305865	0.0952104	0	0	0.368459	0.274512	0.166898		0.109503	0.0627267	0.120892	0	0	0.0717888
0.101751	0.464066	0.182203	0.44686	0.0889219	0.303735	0.172998	0.0834999	0.286392	0.0870473	0	0	0.36917	0.264836	0.161115		0.0904188	0.0513351	0.11554	0	0	0.0726487			0.0929279	0.459653	0.17871	0.428939	0.0884317	0.295226	0.165288	0.0788107	0.269539	0.0739446	0	0	0.367455	0.261426	0.149443		0.0870648	0.0513154	0.10449	0	0	0.065667
0.0841046	0.45524	0.175217	0.411018	0.0879415	0.286716	0.157577	0.0741215	0.252687	0.0608418	0	0	0.365739	0.258016	0.137772		0.0837108	0.0512956	0.0934394	0	0	0.0586854			0.0890267	0.448009	0.171116	0.391079	0.0915622	0.271059	0.151373	0.0743264	0.235405	0.0658913	0	0	0.365763	0.25748	0.135031		0.0757155	0.0390095	0.0910966	0	0	0.0559968
0.0939488	0.440778	0.167015	0.371139	0.0951828	0.255403	0.145169	0.0745313	0.218123	0.0709407	0	0	0.365788	0.256944	0.13229		0.0677203	0.0267233	0.0887539	0	0	0.0533083			0.0928355	0.433102	0.158744	0.356275	0.0941776	0.244885	0.151187	0.0700456	0.203307	0.0719923	0	0	0.35745	0.24799	0.125763		0.0577867	0.0248399	0.0835903	0	0	0.047743
0.0917221	0.425426	0.150473	0.341412	0.0931724	0.234367	0.157204	0.0655599	0.188491	0.0730439	0	0	0.349113	0.239036	0.119235		0.0478531	0.0229565	0.0784267	0	0	0.0421778			0.0886852	0.417477	0.141688	0.331517	0.0890321	0.228515	0.159542	0.060274	0.178419	0.0732849	0	0	0.346129	0.229509	0.116535		0.0442665	0.0148036	0.0792196	0	0	0.0482808
0.0856483	0.409529	0.132902	0.321622	0.0848917	0.222663	0.16188	0.0549881	0.168347	0.0735259	0	0	0.343146	0.219981	0.113834		0.04068	0.00665061	0.0800125	0	0	0.0543837			0.0862644	0.404461	0.122981	0.312031	0.0888653	0.220005	0.151338	0.0515974	0.158242	0.0753385	0	0	0.334093	0.21081	0.102837		0.0379623	0.00661358	0.0778315	0	0	0.0504137
0.0868804	0.399393	0.11306	0.30244	0.0928389	0.217347	0.140796	0.0482067	0.148137	0.077151	0	0	0.32504	0.201639	0.0918393		0.0352446	0.00657655	0.0756506	0	0	0.0464437			0.0853118	0.394641	0.107026	0.275891	0.0881905	0.202926	0.127133	0.0460551	0.137508	0.0717913	0	0	0.325889	0.184016	0.0896431		0.0359616	0.00648161	0.0684627	0	0	0.0440986
0.0837432	0.389888	0.100992	0.249342	0.0835421	0.188505	0.11347	0.0439036	0.126879	0.0664315	0	0	0.326737	0.166393	0.0874469		0.0366787	0.00638667	0.0612748	0	0	0.0417535			0.087081	0.384352	0.0951373	0.236074	0.0853796	0.189038	0.101082	0.0399836	0.125871	0.0641691	0	0	0.317727	0.157376	0.0871554		0.0278689	0.00351326	0.0637662	0	0	0.0389888
0.0904189	0.378816	0.0892826	0.222807	0.0872171	0.189572	0.0886942	0.0360637	0.124863	0.0619067	0	0	0.308716	0.148359	0.0868638		0.0190592	0.000639855	0.0662576	0	0	0.0362241			0.0887293	0.378163	0.0785628	0.215743	0.08115	0.18325	0.0709127	0.0289271	0.117881	0.0569611	0	0	0.305237	0.137946	0.089589		0.0220973	0.00914706	0.0621468	0	0	0.0394647
0.0870398	0.37751	0.0678429	0.208678	0.075083	0.176928	0.0531312	0.0217905	0.110898	0.0520156	0	0	0.301759	0.127533	0.0923141		0.0251355	0.0176543	0.0580359	0	0	0.0427052			0.0843571	0.373474	0.0640896	0.192106	0.0704711	0.17959	0.0524501	0.0334859	0.105855	0.0475938	0	0	0.29332	0.128161	0.0884027		0.0246814	0.0116937	0.0564992	0	0	0.0481124
0.0816745	0.369438	0.0603363	0.175533	0.0658592	0.182252	0.051769	0.0451812	0.100813	0.043172	0	0	0.284882	0.128789	0.0844914		0.0242273	0.00573319	0.0549625	0	0	0.0535197			0.0882541	0.362772	0.0607886	0.17069	0.0715446	0.172103	0.0549496	0.045596	0.101205	0.0323511	0	0	0.275581	0.125832	0.08413		0.0201534	0.0131216	0.0591539	0	0	0.0458035
0.0948338	0.356106	0.0612409	0.165846	0.07723	0.161954	0.0581301	0.0460109	0.101598	0.0215302	0	0	0.26628	0.122876	0.0837686		0.0160795	0.0205101	0.0633452	0	0	0.0380874			0.0932616	0.350662	0.0600483	0.149218	0.0746363	0.161183	0.0522623	0.0484145	0.0948618	0.0157853	0	0	0.261068	0.122856	0.0860416		0.0161925	0.0106698	0.0552795	0	0	0.0327004
0.0916894	0.345219	0.0588556	0.13259	0.0720425	0.160412	0.0463946	0.0508181	0.0881261	0.0100404	0	0	0.255857	0.122837	0.0883146		0.0163055	0.000829558	0.0472139	0	0	0.0273135			0.0899679	0.348849	0.0539125	0.119426	0.0711211	0.161231	0.0503506	0.0541746	0.0907084	0.0102422	0	0	0.254209	0.122937	0.0815995		0.0148214	0.00874835	0.0511365	0	0	0.0272754
0.0882463	0.35248	0.0489693	0.106263	0.0701996	0.16205	0.0543067	0.0575312	0.0932907	0.010444	0	0	0.25256	0.123037	0.0748844		0.0133374	0.0166671	0.0550592	0	0	0.0272373			0.0441231	0.17624	0.0244847	0.0531314	0.0350998	0.0810251	0.0271533	0.0287656	0.0466453	0.00522199	0	0	0.12628	0.0615183	0.0374422		0.00666868	0.00833357	0.0275296	0	0	0.0136187
																							Integral sum	2.45879	11.0066	4.37743	8.59906	2.54569	6.22633	4.01888	2.10013	6.37257	2.17316	0	0	6.76481	5.04865	3.249		2.12005	1.6581	2.51866	0	0	1.4082
36hr
Control 1	Control 2	Control 3	Control 4	Control 5	Control 6	Control 7	Control 8	Control 9	Control 10	Control 11	Control 12	Control 13	Control 14	Control 15		Mutant 1	Mutant 2	Mutant 3	Mutant 4	Mutant 5	Mutant 6
0.0152094	0.00278439	0	0	0	0	0	0	0.0073828	0.0267129	0.00415016	0	0	0.00210303	0.00908715		0.0065066	0	0	0.00415016	0	0.0239372			0.0150677	0.00480578	0.018324	0.0193064	0.0224707	0.00546558	0.00746216	0.013306	0.0768908	0.0272956	0.0152505	0.00544716	0.00500162	0.0201539	0.0161872		0.0156992	0.00955205	0.00442767	0.0152505	0.00500162	0.0393681
0.014926	0.00682716	0.0366481	0.0386128	0.0449413	0.0109312	0.0149243	0.026612	0.146399	0.0278783	0.0263509	0.0108943	0.0100032	0.0382048	0.0232873		0.0248919	0.0191041	0.00885533	0.0263509	0.0100032	0.0547989			0.0631345	0.0231526	0.0656815	0.0904531	0.0686795	0.0445738	0.0602957	0.0652256	0.223622	0.119812	0.0555852	0.0429746	0.0245304	0.100254	0.0850591		0.0320473	0.0437325	0.0202075	0.0555852	0.0245304	0.0710816
0.111343	0.0394781	0.0947148	0.142294	0.0924177	0.0782165	0.105667	0.103839	0.300845	0.211745	0.0848194	0.0750549	0.0390576	0.162302	0.146831		0.0392027	0.0683609	0.0315596	0.0848194	0.0390576	0.0873643			0.131057	0.059334	0.165339	0.16684	0.122317	0.108552	0.113147	0.126796	0.331287	0.246422	0.111855	0.088186	0.0722403	0.177133	0.23212		0.0518389	0.0763019	0.049293	0.111855	0.0722403	0.0892278
0.150771	0.07919	0.235964	0.191387	0.152217	0.138888	0.120627	0.149753	0.36173	0.281099	0.13889	0.101317	0.105423	0.191963	0.317409		0.0644751	0.084243	0.0670264	0.13889	0.105423	0.0910914			0.204088	0.095356	0.23346	0.21544	0.174328	0.160383	0.156419	0.184494	0.396385	0.316954	0.174534	0.111613	0.130745	0.217585	0.362967		0.0763631	0.0888296	0.0852553	0.174534	0.130745	0.102305
0.257404	0.111522	0.230957	0.239493	0.19644	0.181879	0.192212	0.219235	0.43104	0.352809	0.210177	0.121909	0.156066	0.243206	0.408525		0.0882511	0.0934163	0.103484	0.210177	0.156066	0.113519			0.298323	0.119166	0.221947	0.257812	0.211694	0.209856	0.226396	0.23524	0.431942	0.382057	0.230844	0.148548	0.184218	0.254664	0.431542		0.103147	0.099631	0.128368	0.230844	0.184218	0.118847
0.339242	0.12681	0.212937	0.276131	0.226947	0.237832	0.26058	0.251244	0.432844	0.411305	0.251511	0.175186	0.21237	0.266121	0.454559		0.118043	0.105846	0.153252	0.251511	0.21237	0.124174			0.356244	0.129353	0.216044	0.284825	0.243496	0.282075	0.260519	0.253157	0.426076	0.446492	0.255014	0.208745	0.230113	0.290652	0.472412		0.132236	0.0985794	0.183569	0.255014	0.230113	0.130777
0.373246	0.131897	0.219151	0.293518	0.260044	0.326317	0.260457	0.25507	0.419308	0.481678	0.258518	0.242304	0.247857	0.315183	0.490266		0.146428	0.091313	0.213885	0.258518	0.247857	0.137379			0.392417	0.135375	0.218018	0.287382	0.273531	0.358142	0.269091	0.264839	0.382187	0.480036	0.255982	0.250644	0.265129	0.349817	0.501153		0.156711	0.0881453	0.23682	0.255982	0.265129	0.139258
0.411588	0.138854	0.216885	0.281247	0.287017	0.389967	0.277724	0.274608	0.345066	0.478394	0.253447	0.258984	0.2824	0.384452	0.51204		0.166994	0.0849776	0.259755	0.253447	0.2824	0.141137			0.414436	0.136449	0.211096	0.27819	0.306919	0.403981	0.277639	0.278381	0.313747	0.465919	0.250794	0.263574	0.293675	0.395019	0.515438		0.173144	0.0864683	0.275096	0.250794	0.293675	0.144773
0.417283	0.134045	0.205307	0.275132	0.326821	0.417995	0.277555	0.282154	0.282427	0.453444	0.248141	0.268165	0.30495	0.405587	0.518837		0.179293	0.087959	0.290437	0.248141	0.30495	0.14841			0.414639	0.127956	0.199324	0.27724	0.335467	0.434767	0.292035	0.290566	0.269301	0.429719	0.25235	0.276884	0.308843	0.411669	0.520411		0.190164	0.0725621	0.298109	0.25235	0.308843	0.146567
0.411995	0.121867	0.19334	0.279347	0.344112	0.45154	0.306515	0.298979	0.256175	0.405995	0.25656	0.285603	0.312736	0.417752	0.521986		0.201035	0.0571652	0.305782	0.25656	0.312736	0.144724			0.411641	0.114299	0.192892	0.266909	0.342105	0.448918	0.310381	0.30112	0.250269	0.375688	0.258121	0.278523	0.31571	0.422156	0.521099		0.196042	0.0526193	0.311827	0.258121	0.31571	0.14034
0.411286	0.10673	0.192444	0.254471	0.340098	0.446296	0.314246	0.303262	0.244363	0.34538	0.259682	0.271444	0.318684	0.42656	0.520212		0.191049	0.0480734	0.317871	0.259682	0.318684	0.135955			0.400166	0.099895	0.179034	0.245826	0.3412	0.453947	0.309656	0.30471	0.236869	0.322131	0.254391	0.271659	0.313736	0.42783	0.515056		0.189187	0.0370834	0.324072	0.254391	0.313736	0.131428
0.389045	0.0930596	0.165625	0.237182	0.342302	0.461598	0.305066	0.306158	0.229375	0.298883	0.249101	0.271873	0.308788	0.429101	0.5099		0.187325	0.0260934	0.330272	0.249101	0.308788	0.126901			0.376364	0.0817608	0.148521	0.227448	0.335601	0.467388	0.292681	0.309348	0.221537	0.301883	0.241733	0.260777	0.309991	0.42767	0.507807		0.18873	0.0220671	0.32269	0.241733	0.309991	0.124067
0.363682	0.0704619	0.131418	0.217714	0.3289	0.473177	0.280296	0.312538	0.213698	0.304884	0.234366	0.24968	0.311194	0.426238	0.505714		0.190135	0.0180408	0.315107	0.234366	0.311194	0.121233			0.342715	0.0618672	0.109344	0.214612	0.320578	0.468479	0.275904	0.308283	0.208954	0.294693	0.216102	0.24752	0.303724	0.418686	0.496454		0.184354	0.0213051	0.31308	0.216102	0.303724	0.116459
0.321747	0.0532726	0.0872703	0.211509	0.312255	0.46378	0.271512	0.304028	0.204209	0.284502	0.197839	0.245359	0.296253	0.411134	0.487194		0.178574	0.0245694	0.311053	0.197839	0.296253	0.111686			0.311498	0.0470488	0.0656733	0.211265	0.313665	0.459542	0.255625	0.307493	0.200649	0.256017	0.171584	0.238395	0.28374	0.400388	0.478726		0.173184	0.022569	0.30576	0.171584	0.28374	0.101691
0.301249	0.0408251	0.0440763	0.211021	0.315074	0.455305	0.239738	0.310957	0.197088	0.227531	0.14533	0.231431	0.271226	0.389642	0.470257		0.167795	0.0205685	0.300468	0.14533	0.271226	0.0916949			0.294347	0.0412223	0.0433692	0.19978	0.301671	0.452144	0.228664	0.299187	0.197016	0.23453	0.124236	0.227755	0.268191	0.36587	0.459279		0.163733	0.0191924	0.293427	0.124236	0.268191	0.0869758
0.287444	0.0416195	0.042662	0.18854	0.288267	0.448983	0.21759	0.287417	0.196944	0.241529	0.103142	0.224078	0.265156	0.342098	0.448301		0.159671	0.0178163	0.286387	0.103142	0.265156	0.0822567			0.279586	0.041635	0.0301777	0.189043	0.269609	0.443506	0.21135	0.277241	0.187952	0.234351	0.085174	0.221717	0.256882	0.332479	0.432818		0.153179	0.0191332	0.277012	0.085174	0.256882	0.0746347
0.271728	0.0416506	0.0176933	0.189547	0.250951	0.438029	0.20511	0.267064	0.178961	0.227173	0.0672059	0.219356	0.248608	0.32286	0.417334		0.146687	0.0204501	0.267637	0.0672059	0.248608	0.0670127			0.261945	0.0473973	0.0241505	0.186376	0.244737	0.425176	0.185426	0.255306	0.181733	0.235231	0.0625387	0.205091	0.243344	0.298256	0.400421		0.137752	0.0202403	0.261364	0.0625387	0.243344	0.0598388
0.252161	0.0531441	0.0306077	0.183206	0.238524	0.412323	0.165741	0.243548	0.184505	0.243289	0.0578714	0.190825	0.23808	0.273652	0.383508		0.128816	0.0200306	0.255091	0.0578714	0.23808	0.0526649			0.244476	0.0534615	0.0283527	0.180517	0.22071	0.409201	0.165443	0.229941	0.176168	0.238456	0.0568718	0.177273	0.231698	0.264915	0.363543		0.113672	0.0184813	0.250872	0.0568718	0.231698	0.0500663
0.236791	0.0537789	0.0260977	0.177827	0.202897	0.406079	0.165146	0.216333	0.167831	0.233623	0.0558722	0.16372	0.225317	0.256179	0.343579		0.0985274	0.016932	0.246654	0.0558722	0.225317	0.0474676			0.221073	0.0561327	0.0332101	0.169638	0.19378	0.401346	0.155274	0.213468	0.165622	0.22967	0.0555002	0.156079	0.216358	0.236204	0.328023		0.0898083	0.0175256	0.233218	0.0555002	0.216358	0.046526
0.205354	0.0584865	0.0403225	0.161448	0.184662	0.396612	0.145403	0.210603	0.163414	0.225717	0.0551282	0.148438	0.207398	0.216229	0.312468		0.0810892	0.0181193	0.219783	0.0551282	0.207398	0.0455844			0.197637	0.0598812	0.0467399	0.158149	0.169675	0.395766	0.143932	0.209359	0.159156	0.218289	0.0553674	0.139828	0.186851	0.205781	0.293424		0.0786428	0.0197534	0.213539	0.0553674	0.186851	0.0412162
0.18992	0.061276	0.0531574	0.15485	0.154687	0.39492	0.142461	0.208116	0.154898	0.21086	0.0556066	0.131218	0.166304	0.195333	0.274379		0.0761964	0.0213874	0.207296	0.0556066	0.166304	0.0368481			0.175263	0.0640855	0.0511408	0.145521	0.154589	0.387931	0.132875	0.206149	0.154613	0.192981	0.0434514	0.124374	0.150161	0.184314	0.26375		0.0720454	0.020709	0.202979	0.0434514	0.150161	0.0357399
0.160606	0.0668951	0.0491243	0.136192	0.15449	0.380942	0.12329	0.204182	0.154328	0.175101	0.0312961	0.11753	0.134019	0.173295	0.25312		0.0678944	0.0200306	0.198663	0.0312961	0.134019	0.0346318			0.145325	0.0683711	0.0597429	0.135927	0.149649	0.365947	0.120661	0.204533	0.155809	0.171566	0.0291394	0.108183	0.127706	0.163532	0.239743		0.0596388	0.0184813	0.190779	0.0291394	0.127706	0.0311935
0.130045	0.069847	0.0703616	0.135661	0.144809	0.350952	0.118032	0.204884	0.15729	0.168031	0.0269827	0.0988353	0.121393	0.153769	0.226367		0.0513832	0.016932	0.182896	0.0269827	0.121393	0.0277553			0.122455	0.0794124	0.063666	0.128576	0.139618	0.34169	0.113986	0.200837	0.150691	0.150854	0.0257785	0.0933065	0.113935	0.149282	0.212346		0.0535156	0.0175256	0.173264	0.0257785	0.113935	0.0216011
0.114865	0.0889778	0.0569703	0.121492	0.134428	0.332427	0.109941	0.19679	0.144093	0.133677	0.0245744	0.0877777	0.106477	0.144796	0.198324		0.055648	0.0181193	0.163633	0.0245744	0.106477	0.0154468			0.109855	0.0878237	0.063294	0.123126	0.134868	0.31601	0.102825	0.193562	0.145974	0.133618	0.0317819	0.0816293	0.102975	0.130723	0.194305		0.0482294	0.0197534	0.159272	0.0317819	0.102975	0.012917
0.104846	0.0866696	0.0696177	0.124761	0.135308	0.299592	0.0957097	0.190335	0.147856	0.133558	0.0389894	0.0754809	0.0994736	0.116649	0.190287		0.0408107	0.0213874	0.154911	0.0389894	0.0994736	0.0103872			0.0994724	0.09083	0.0640379	0.120494	0.135834	0.293913	0.0850827	0.193491	0.146094	0.136558	0.0336145	0.0781464	0.0991111	0.111114	0.183093		0.0336017	0.0217546	0.14688	0.0336145	0.0991111	0.0116853
0.0940992	0.0949904	0.058458	0.116228	0.13636	0.288233	0.0744557	0.196646	0.144332	0.139557	0.0282396	0.0808118	0.0987486	0.105578	0.175899		0.0263926	0.0221218	0.138849	0.0282396	0.0987486	0.0129834			0.0470496	0.0474952	0.029229	0.0581139	0.0681799	0.144116	0.0372278	0.0983232	0.0721661	0.0697784	0.0141198	0.0404059	0.0493743	0.052789	0.0879496		0.0131963	0.0110609	0.0694243	0.0141198	0.0493743	0.00649169
																							Integral sum	6.33027	1.97357	2.78181	4.83881	5.59497	8.68281	4.79	5.82436	5.86271	6.711	3.36171	4.34728	5.08798	6.80894	9.11513		2.87986	1.04306	5.33061	3.36171	5.08798	2.07507
Branching endpoints
	12 hr			18 hr			24 hr			36 hr
	Control	Mutant		Control	Mutant		Control	Mutant		Control	Mutant
1	7	8		8	8		9	8		10	9
2	9	9		9	10		10	11		10	13
3	7	9		9	9		8	9		10	10
4	9	8		9	8		10	8		11	13
5	7	8		8	7		9	8		10	10
6	7	7		8	8		8	9		8	11
7	8	8		8	8		9	9		9	10
8	9			9			9			11
9	9			10			11			15
10	9			10			10			11
11	8			9			9			9
12	7			9			9			10
13	8			9			9			10
14	9			9			9			12
15	9			10			11			13

## Sheet: GOF statistics
Table S2: refers to Fig. 6B and 6C
Tbx2+/+;HprtTBX2/+ and Tbx2cre/+;HprtTBX2/y
Kymograph measurement											Integral calculation
24hr	Control			Mutant							24hr
	average	sd		average	sd		ttest						Integral			Integral		ttest
	0.032215	0.0841916		0.00261943	0.00418562		0.407318	n.s				Control 1	2.45879		Mutant 1	2.12005		0.0302762	*
	0.0467578	0.0850793		0.0135896	0.0206902		0.36382	n.s				Control 2	11.0066		Mutant 2	1.6581
	0.116142	0.113372		0.0372295	0.0430924		0.118093	n.s				Control 3	4.37743		Mutant 3	2.51866
	0.173672	0.147975		0.0529562	0.0472039		0.0683281	n.s				Control 4	8.59906		Mutant 4	0
	0.2153	0.153755		0.0820215	0.0709358		0.0582388	n.s				Control 5	2.54569		Mutant 5	0
	0.238561	0.156871		0.0878444	0.0749428		0.0381552	*				Control 6	6.22633		Mutant 6	1.4082
	0.249348	0.159438		0.100426	0.0902181		0.0460995	*				Control 7	4.01888
	0.252317	0.158441		0.102444	0.0868179		0.0430633	*				Control 8	2.10013
	0.253365	0.161203		0.101503	0.0867982		0.0435208	*				Control 9	6.37257
	0.248236	0.159325		0.0940241	0.0796159		0.0374927	*				Control 10	2.17316
	0.236965	0.159227		0.088126	0.074934		0.0428782	*				Control 11	0
	0.226223	0.156553		0.07557	0.0653185		0.036354	*				Control 12	0
	0.211392	0.155602		0.0666464	0.0571773		0.0411005	*				Control 13	6.76481
	0.20084	0.149424		0.0549905	0.047528		0.0321121	*				Control 14	5.04865
	0.187133	0.145359		0.0478552	0.0401819		0.0343355	*				Control 15	3.249
	0.17915	0.135799		0.0394176	0.036597		0.0241492	*
	0.16855	0.127947		0.0319023	0.0304633		0.0195577	*			average		4.3294			1.28417
	0.159531	0.123422		0.0302878	0.0333304		0.0220552	*			sd		3.07164			1.06546
	0.149651	0.118331		0.0273192	0.0306183		0.0234516	*
	0.135152	0.112544		0.0243489	0.0257947		0.029583	*
	0.127572	0.107626		0.0203635	0.0267503		0.0281588	*
	0.116835	0.108421		0.0239218	0.0232459		0.0544229	n.s
	0.111613	0.103486		0.0230738	0.025732		0.0553957	n.s
	0.107827	0.0978908		0.0230037	0.0243617		0.0526314	n.s
	0.101546	0.0948032		0.0152771	0.0191906		0.0421474	*
	0.0996175	0.09549		0.0187168	0.0206259		0.0569925	n.s
36hr	Control			Mutant							36hr
	average	sd		average	sd		ttest						Integral			Integral		ttest
0	0.00449532	0.00759825		0.00576567	0.00930692		0.748466	n.s				Control 1	6.33027		Mutant 1	2.87986		0.0280037	*
1	0.0318294	0.0339135		0.0240007	0.0167579		0.599583	n.s				Control 2	1.97357		Mutant 2	1.04306
2	0.119242	0.0676655		0.0583941	0.0248966		0.0475744	*				Control 3	2.78181		Mutant 3	5.33061
3	0.181108	0.0831849		0.0918582	0.0276444		0.0200635	*				Control 4	4.83881		Mutant 4	3.36171
4	0.236858	0.094206		0.127486	0.0471719		0.0147362	*				Control 5	5.59497		Mutant 5	5.08798
5	0.275708	0.0943574		0.160866	0.0585395		0.0126743	*				Control 6	8.68281		Mutant 6	2.07507
6	0.304987	0.098974		0.182563	0.0673607		0.0123728	*				Control 7	4.79
7	0.319511	0.0998142		0.198118	0.0787149		0.0156926	*				Control 8	5.82436
8	0.321189	0.102201		0.209865	0.0855224		0.0297576	*				Control 9	5.86271
9	0.3243	0.103761		0.213	0.0995415		0.0369212	*				Control 10	6.711
10	0.31701	0.105125		0.211886	0.107664		0.0536799	n.s				Control 11	3.36171
11	0.306471	0.109957		0.204747	0.115611		0.0742336	n.s				Control 12	4.34728
12	0.294931	0.118204		0.198346	0.115056		0.104798	n.s				Control 13	5.08798
13	0.276791	0.12083		0.186662	0.10915		0.129929	n.s				Control 14	6.80894
14	0.256717	0.126181		0.16618	0.106072		0.138533	n.s				Control 15	9.11513
15	0.241585	0.121655		0.152405	0.105998		0.133368	n.s
16	0.224218	0.120245		0.136267	0.102924		0.132813	n.s			average		5.47409			3.29638
17	0.210066	0.108341		0.125426	0.10048		0.115805	n.s			sd		1.96652			1.67897
18	0.195405	0.102042		0.115128	0.0974143		0.115799	n.s
19	0.182112	0.0936699		0.104517	0.0869443		0.0967741	n.s
20	0.169866	0.0874936		0.0939396	0.0753573		0.0783173	n.s
21	0.154294	0.0850789		0.0810891	0.0709437		0.0788412	n.s
22	0.14515	0.0766507		0.0712236	0.0665967		0.0529124	n.s
23	0.133041	0.0715084		0.063983	0.0596951		0.0508902	n.s
24	0.127276	0.0632509		0.0609933	0.0553579		0.037283	*
25	0.122176	0.0633924		0.0545558	0.0516221		0.0320745	*
Branching endpoints
	Control			Mutant
	average	sd		average	sd		ttest
12hr	8	0.912871		8.4	0.547723		0.377089	n.s
18hr	8.84615	0.688737		8.4	1.14018		0.319444	n.s
24hr	9.23077	0.83205		8.8	1.30384		0.411972	n.s
36hr	10.3077	1.6525		11	1.87083		0.452817	n.s
